# Supplementary material for: Expression of Interferons Lambda 3 and 4 Induces Identical Response in Human Liver Cell Lines Depending Exclusively on Canonical Signaling
Source: Int J Mol Sci. 2021 Mar 4;22(5):2560. doi: 10.3390/ijms22052560 (PMC7961969; doi:10.3390/ijms22052560)
Supplement: Supplementary file 1 [file ijms-22-02560-s001.zip › Suplementary_Table_4_JK.xlsx]

## Sheet: IFNLR1KO_IFNL4 vs Mock
Ensembl_Gene_ID	Symbol	Definition	Biotype	logFC	p-value	adj, P-value	IFNLR1KO_IFNL4 normalized_counts	IFNLR1KO_Mock_ normalized_counts	Mean
ENSG00000272395	IFNL4	polymorphic_pseudogene	interferon lambda 4 (gene/pseudogene)	12	1.48e-62	4.96e-59	8760	1.7	4380
ENSG00000183134	PTGDR2	protein_coding	prostaglandin D2 receptor 2	6.61	9.18e-07	4.4e-05	104	0	51.9
ENSG00000264424	MYH4	protein_coding	myosin heavy chain 4	5.53	1.72e-08	1.16e-06	74.1	1.08	37.6
ENSG00000115850	LCT	protein_coding	lactase	5.39	1.13e-06	5.23e-05	55.6	0.54	28.1
ENSG00000115339	GALNT3	protein_coding	polypeptide N-acetylgalactosaminyltransferase 3	5.32	2.55e-06	0.000107	26.1	0	13.1
ENSG00000131620	ANO1	protein_coding	anoctamin 1	4.97	4.97e-06	0.000191	24.5	0	12.2
ENSG00000121858	TNFSF10	protein_coding	TNF superfamily member 10	4.42	1.91e-11	2.03e-09	82.8	2.71	42.7
ENSG00000144035	NAT8	protein_coding	N-acetyltransferase 8 (putative)	4.33	8.97e-15	1.41e-12	108	4.79	56.4
ENSG00000110887	DAO	protein_coding	D-amino acid oxidase	4.3	8.21e-07	3.98e-05	66.9	1.55	34.2
ENSG00000143921	ABCG8	protein_coding	ATP binding cassette subfamily G member 8	4.13	1.6e-05	0.000548	19.2	0	9.59
ENSG00000241570	PAQR9-AS1	antisense	PAQR9 antisense RNA 1	4.11	2.02e-05	0.000669	51.4	0	25.7
ENSG00000172482	AGXT	protein_coding	alanine--glyoxylate and serine--pyruvate aminotransferase	4.1	1.69e-05	0.000572	19.7	0	9.87
ENSG00000143627	PKLR	protein_coding	pyruvate kinase L/R	3.96	4.28e-06	0.00017	36.3	1.08	18.7
ENSG00000151224	MAT1A	protein_coding	methionine adenosyltransferase 1A	3.88	4.3e-12	4.93e-10	193	11.2	102
ENSG00000173110	HSPA6	protein_coding	heat shock protein family A (Hsp70) member 6	3.84	2.49e-05	0.000811	24.4	0	12.2
ENSG00000084110	HAL	protein_coding	histidine ammonia-lyase	3.55	1.6e-44	1.92e-41	640	51.8	346
ENSG00000118520	ARG1	protein_coding	arginase 1	3.53	2.61e-17	5.09e-15	372	27.3	199
ENSG00000155792	DEPTOR	protein_coding	DEP domain containing MTOR interacting protein	3.45	7.53e-07	3.68e-05	35	1.7	18.3
ENSG00000021852	C8B	protein_coding	complement C8 beta chain	3.37	4.2e-05	0.00128	24.6	0	12.3
ENSG00000144152	FBLN7	protein_coding	fibulin 7	3.28	4.87e-07	2.46e-05	49.9	2.71	26.3
ENSG00000261701	HPR	protein_coding	haptoglobin-related protein	3.16	4.88e-05	0.00145	46.7	0	23.3
ENSG00000134240	HMGCS2	protein_coding	3-hydroxy-3-methylglutaryl-CoA synthase 2	3.13	8.95e-17	1.69e-14	720	70.1	395
ENSG00000174607	UGT8	protein_coding	UDP glycosyltransferase 8	3.1	6.58e-09	4.87e-07	65.3	5.41	35.3
ENSG00000171219	CDC42BPG	protein_coding	CDC42 binding protein kinase gamma	3.08	1.42e-05	0.000496	32.1	1.62	16.9
ENSG00000174992	ZG16	protein_coding	zymogen granule protein 16	3.05	3.06e-17	5.92e-15	213	21.7	117
ENSG00000129988	LBP	protein_coding	lipopolysaccharide binding protein	3.01	2.84e-06	0.000118	33.8	1.94	17.9
ENSG00000186198	SLC51B	protein_coding	solute carrier family 51 beta subunit	3.01	3.03e-06	0.000125	63.5	4.1	33.8
ENSG00000119535	CSF3R	protein_coding	colony stimulating factor 3 receptor	2.99	4.55e-09	3.46e-07	190	17.3	104
ENSG00000083067	TRPM3	protein_coding	transient receptor potential cation channel subfamily M member 3	2.97	2.92e-08	1.86e-06	99.6	8.89	54.2
ENSG00000163586	FABP1	protein_coding	fatty acid binding protein 1	2.95	2.5e-24	9.54e-22	253	29	141
ENSG00000144820	ADGRG7	protein_coding	adhesion G protein-coupled receptor G7	2.79	7.74e-05	0.00218	16	0	8.02
ENSG00000166866	MYO1A	protein_coding	myosin IA	2.78	7.79e-05	0.00218	13.1	0	6.53
ENSG00000054179	ENTPD2	protein_coding	ectonucleoside triphosphate diphosphohydrolase 2	2.77	1.27e-07	7.07e-06	56.4	5.72	31.1
ENSG00000123453	SARDH	protein_coding	sarcosine dehydrogenase	2.76	3.7e-24	1.38e-21	378	51.6	215
ENSG00000074276	CDHR2	protein_coding	cadherin related family member 2	2.7	6.65e-10	5.62e-08	81.5	9.82	45.6
ENSG00000110777	POU2AF1	protein_coding	POU class 2 associating factor 1	2.7	2.63e-08	1.69e-06	72.9	7.89	40.4
ENSG00000165471	MBL2	protein_coding	mannose binding lectin 2	2.61	4.13e-35	2.9e-32	1360	210	784
ENSG00000188641	DPYD	protein_coding	dihydropyrimidine dehydrogenase	2.59	9.95e-24	3.49e-21	636	96.6	366
ENSG00000116667	C1orf21	protein_coding	chromosome 1 open reading frame 21	2.58	7.05e-09	5.18e-07	164	21.3	92.7
ENSG00000138356	AOX1	protein_coding	aldehyde oxidase 1	2.56	1.02e-20	2.65e-18	380	59	219
ENSG00000086696	HSD17B2	protein_coding	hydroxysteroid 17-beta dehydrogenase 2	2.5	2.38e-06	0.000101	86.6	9.05	47.8
ENSG00000276900	AC023157.3	antisense	novel transcript, antisense to AMN1	2.44	0.000112	0.00297	23.3	0	11.6
ENSG00000113889	KNG1	protein_coding	kininogen 1	2.43	2.16e-25	9.08e-23	1050	184	617
ENSG00000066813	ACSM2B	protein_coding	acyl-CoA synthetase medium chain family member 2B	2.4	4.92e-06	0.000189	70.6	7.96	39.3
ENSG00000185432	METTL7A	protein_coding	methyltransferase like 7A	2.38	7.19e-53	2.02e-49	1460	271	868
ENSG00000137745	MMP13	protein_coding	matrix metallopeptidase 13	2.38	0.000125	0.00325	12.7	0	6.37
ENSG00000112769	LAMA4	protein_coding	laminin subunit alpha 4	2.34	1.28e-09	1.05e-07	208	34	121
ENSG00000004468	CD38	protein_coding	CD38 molecule	2.34	7.15e-07	3.51e-05	218	29.5	124
ENSG00000145321	GC	protein_coding	GC, vitamin D binding protein	2.31	3.48e-80	5.85e-76	20300	4020	12200
ENSG00000172955	ADH6	protein_coding	alcohol dehydrogenase 6 (class V)	2.31	3.2e-15	5.32e-13	313	55.9	184
ENSG00000012504	NR1H4	protein_coding	nuclear receptor subfamily 1 group H member 4	2.3	1.15e-23	3.94e-21	1860	352	1110
ENSG00000172296	SPTLC3	protein_coding	serine palmitoyltransferase long chain base subunit 3	2.29	5.21e-23	1.59e-20	705	135	420
ENSG00000109193	SULT1E1	protein_coding	sulfotransferase family 1E member 1	2.28	6.45e-08	3.75e-06	134	21.5	77.7
ENSG00000180745	CLRN3	protein_coding	clarin 3	2.27	2.95e-08	1.86e-06	185	30.4	108
ENSG00000141485	SLC13A5	protein_coding	solute carrier family 13 member 5	2.26	4.29e-38	3.14e-35	1440	293	869
ENSG00000108984	MAP2K6	protein_coding	mitogen-activated protein kinase kinase 6	2.24	1e-11	1.09e-09	360	65.8	213
ENSG00000253525	AC104966.1	processed_pseudogene	ceruloplasmin (ferroxidase) (CP) pseudogene	2.23	9.36e-05	0.00256	87.1	5.1	46.1
ENSG00000187889	FYB2	protein_coding	FYN binding protein 2	2.23	0.000104	0.00278	42.4	1.94	22.1
ENSG00000101049	SGK2	protein_coding	SGK2, serine/threonine kinase 2	2.22	3.08e-09	2.36e-07	195	34.2	115
ENSG00000243955	GSTA1	protein_coding	glutathione S-transferase alpha 1	2.2	3.84e-15	6.27e-13	163	32.2	97.8
ENSG00000102575	ACP5	protein_coding	acid phosphatase 5, tartrate resistant	2.2	2.16e-05	0.000708	45.1	4.8	25
ENSG00000115425	PECR	protein_coding	peroxisomal trans-2-enoyl-CoA reductase	2.19	1.32e-07	7.3e-06	216	36.9	127
ENSG00000141505	ASGR1	protein_coding	asialoglycoprotein receptor 1	2.18	1.36e-19	3.18e-17	751	154	452
ENSG00000070019	GUCY2C	protein_coding	guanylate cyclase 2C	2.17	3.17e-12	3.78e-10	246	46.8	146
ENSG00000055957	ITIH1	protein_coding	inter-alpha-trypsin inhibitor heavy chain 1	2.17	3.62e-12	4.26e-10	233	45.3	139
ENSG00000213759	UGT2B11	protein_coding	UDP glucuronosyltransferase family 2 member B11	2.17	1.29e-06	5.95e-05	399	61.9	230
ENSG00000104381	GDAP1	protein_coding	ganglioside induced differentiation associated protein 1	2.16	0.000127	0.00328	47.6	0	23.8
ENSG00000167780	SOAT2	protein_coding	sterol O-acyltransferase 2	2.12	1.66e-16	3.11e-14	439	93.5	266
ENSG00000002933	TMEM176A	protein_coding	transmembrane protein 176A	2.12	5.4e-13	7.1e-11	419	85.9	252
ENSG00000124610	HIST1H1A	protein_coding	histone cluster 1 H1 family member a	2.12	2.84e-10	2.61e-08	546	108	327
ENSG00000131781	FMO5	protein_coding	flavin containing monooxygenase 5	2.12	5.35e-08	3.18e-06	119	22.1	70.7
ENSG00000131187	F12	protein_coding	coagulation factor XII	2.11	1.26e-27	6.06e-25	1020	226	621
ENSG00000261371	PECAM1	protein_coding	platelet and endothelial cell adhesion molecule 1	2.1	1.56e-09	1.26e-07	202	39.9	121
ENSG00000122194	PLG	protein_coding	plasminogen	2.05	3.2e-31	1.92e-28	1040	240	640
ENSG00000188338	SLC38A3	protein_coding	solute carrier family 38 member 3	2.03	5.06e-32	3.15e-29	3270	775	2020
ENSG00000224189	HAGLR	antisense	HOXD antisense growth-associated long non-coding RNA	2.02	3.45e-08	2.14e-06	208	41.8	125
ENSG00000139540	SLC39A5	protein_coding	solute carrier family 39 member 5	2.01	1.28e-15	2.24e-13	356	82.3	219
ENSG00000257017	HP	protein_coding	haptoglobin	1.98	3.2e-10	2.91e-08	488	109	298
ENSG00000180884	ZNF792	protein_coding	zinc finger protein 792	1.98	2.52e-06	0.000107	139	25.8	82.6
ENSG00000124568	SLC17A1	protein_coding	solute carrier family 17 member 1	1.98	0.000106	0.00282	71.3	6.49	38.9
ENSG00000105398	SULT2A1	protein_coding	sulfotransferase family 2A member 1	1.96	4.19e-10	3.69e-08	375	83.5	229
ENSG00000268230	AC012313.3	processed_transcript	novel transcript	1.96	0.000201	0.00478	17.6	0	8.78
ENSG00000278017	AC064801.1	antisense	novel transcript, antisense to ZCCHC2	1.95	0.000193	0.00464	23	0	11.5
ENSG00000134323	MYCN	protein_coding	MYCN proto-oncogene, bHLH transcription factor	1.94	9.17e-29	4.67e-26	1300	328	816
ENSG00000145192	AHSG	protein_coding	alpha 2-HS glycoprotein	1.93	1.22e-64	6.83e-61	42200	11000	26600
ENSG00000147255	IGSF1	protein_coding	immunoglobulin superfamily member 1	1.91	2.68e-25	1.1e-22	672	170	421
ENSG00000160181	TFF2	protein_coding	trefoil factor 2	1.91	1.31e-14	2.02e-12	457	113	285
ENSG00000106327	TFR2	protein_coding	transferrin receptor 2	1.89	1.9e-14	2.9e-12	361	90.6	226
ENSG00000185002	RFX6	protein_coding	regulatory factor X6	1.89	1.03e-09	8.56e-08	131	31.7	81.5
ENSG00000204616	TRIM31	protein_coding	tripartite motif containing 31	1.87	6.2e-11	5.99e-09	215	52.7	134
ENSG00000021645	NRXN3	protein_coding	neurexin 3	1.87	0.00023	0.00537	15.8	0	7.9
ENSG00000156076	WIF1	protein_coding	WNT inhibitory factor 1	1.87	0.00023	0.00537	15.8	0	7.89
ENSG00000047457	CP	protein_coding	ceruloplasmin	1.85	1.11e-26	5.18e-24	3220	861	2040
ENSG00000108924	HLF	protein_coding	HLF, PAR bZIP transcription factor	1.84	2.8e-11	2.87e-09	315	79.6	197
ENSG00000117643	MAN1C1	protein_coding	mannosidase alpha class 1C member 1	1.83	2.33e-06	0.0001	200	43.7	122
ENSG00000135318	NT5E	protein_coding	5'-nucleotidase ecto	1.82	7.87e-34	5.29e-31	1550	426	986
ENSG00000180113	TDRD6	protein_coding	tudor domain containing 6	1.81	3.41e-08	2.12e-06	337	82.5	210
ENSG00000115267	IFIH1	protein_coding	interferon induced with helicase C domain 1	1.81	0.000188	0.00455	16.2	1.62	8.89
ENSG00000149573	MPZL2	protein_coding	myelin protein zero like 2	1.8	5.23e-10	4.51e-08	390	101	246
ENSG00000270055	AC127502.2	sense_intronic	novel transcript	1.8	0.000274	0.00616	38.1	1.08	19.6
ENSG00000167711	SERPINF2	protein_coding	serpin family F member 2	1.79	1.14e-29	6.41e-27	3090	868	1980
ENSG00000186529	CYP4F3	protein_coding	cytochrome P450 family 4 subfamily F member 3	1.79	6.93e-24	2.48e-21	744	209	476
ENSG00000169903	TM4SF4	protein_coding	transmembrane 4 L six family member 4	1.78	3.27e-06	0.000133	152	34.8	93.5
ENSG00000172794	RAB37	protein_coding	RAB37, member RAS oncogene family	1.78	7.22e-06	0.000265	138	30.5	84.4
ENSG00000144891	AGTR1	protein_coding	angiotensin II receptor type 1	1.77	2.5e-20	6.28e-18	1630	458	1040
ENSG00000066248	NGEF	protein_coding	neuronal guanine nucleotide exchange factor	1.76	1.47e-12	1.83e-10	806	220	513
ENSG00000132854	KANK4	protein_coding	KN motif and ankyrin repeat domains 4	1.76	7.02e-06	0.000259	184	40.2	112
ENSG00000114771	AADAC	protein_coding	arylacetamide deacetylase	1.76	0.000158	0.00392	105	12.1	58.7
ENSG00000187801	ZFP69B	protein_coding	ZFP69 zinc finger protein B	1.76	0.00023	0.00536	72.7	5.5	39.1
ENSG00000170099	SERPINA6	protein_coding	serpin family A member 6	1.75	9.87e-13	1.25e-10	646	179	412
ENSG00000123561	SERPINA7	protein_coding	serpin family A member 7	1.75	5.61e-05	0.00164	280	48.9	164
ENSG00000204444	APOM	protein_coding	apolipoprotein M	1.74	1.25e-15	2.22e-13	938	268	603
ENSG00000106565	TMEM176B	protein_coding	transmembrane protein 176B	1.74	2.17e-12	2.6e-10	645	178	412
ENSG00000153902	LGI4	protein_coding	leucine rich repeat LGI family member 4	1.74	3.52e-05	0.00111	56.9	10.5	33.7
ENSG00000125730	C3	protein_coding	complement C3	1.73	1.75e-63	7.34e-60	16500	4920	10700
ENSG00000196177	ACADSB	protein_coding	acyl-CoA dehydrogenase short/branched chain	1.73	3.59e-40	3.18e-37	2470	729	1600
ENSG00000122787	AKR1D1	protein_coding	aldo-keto reductase family 1 member D1	1.73	2.48e-08	1.61e-06	340	90	215
ENSG00000149742	SLC22A9	protein_coding	solute carrier family 22 member 9	1.72	6.35e-21	1.72e-18	1490	436	961
ENSG00000166278	C2	protein_coding	complement C2	1.72	6.07e-08	3.57e-06	290	76.9	184
ENSG00000257743	MGAM2	protein_coding	maltase-glucoamylase 2 (putative)	1.71	2.23e-10	2.07e-08	554	155	354
ENSG00000124406	ATP8A1	protein_coding	ATPase phospholipid transporting 8A1	1.71	0.000251	0.0057	26.7	0	13.4
ENSG00000091513	TF	protein_coding	transferrin	1.7	7.19e-42	7.55e-39	13100	3970	8540
ENSG00000157087	ATP2B2	protein_coding	ATPase plasma membrane Ca2+ transporting 2	1.7	1.02e-24	3.97e-22	1850	551	1200
ENSG00000084674	APOB	protein_coding	apolipoprotein B	1.69	9.99e-41	9.33e-38	86100	26100	56100
ENSG00000039068	CDH1	protein_coding	cadherin 1	1.68	1.69e-39	1.35e-36	3710	1130	2420
ENSG00000091583	APOH	protein_coding	apolipoprotein H	1.68	2.18e-23	7.05e-21	3510	1060	2290
ENSG00000254827	SLC22A18AS	protein_coding	solute carrier family 22 member 18 antisense	1.68	0.000273	0.00614	21.7	0	10.8
ENSG00000099937	SERPIND1	protein_coding	serpin family D member 1	1.67	1.28e-44	1.65e-41	4910	1520	3220
ENSG00000187045	TMPRSS6	protein_coding	transmembrane serine protease 6	1.66	3.94e-05	0.00121	152	33.2	92.7
ENSG00000132522	GPS2	protein_coding	G protein pathway suppressor 2	1.66	0.000283	0.00635	21.7	0	10.9
ENSG00000112818	MEP1A	protein_coding	meprin A subunit alpha	1.64	1.01e-13	1.41e-11	1030	310	668
ENSG00000139192	TAPBPL	protein_coding	TAP binding protein like	1.64	0.000218	0.00512	88	11.4	49.7
ENSG00000080618	CPB2	protein_coding	carboxypeptidase B2	1.62	7.77e-19	1.79e-16	2120	665	1390
ENSG00000108950	FAM20A	protein_coding	FAM20A, golgi associated secretory pathway pseudokinase	1.61	7.53e-15	1.19e-12	413	129	271
ENSG00000006659	LGALS14	protein_coding	galectin 14	1.61	1.35e-06	6.2e-05	242	65.8	154
ENSG00000163449	TMEM169	protein_coding	transmembrane protein 169	1.61	1.03e-05	0.000369	133	33.3	83
ENSG00000178473	UCN3	protein_coding	urocortin 3	1.61	0.000334	0.00731	14.3	0	7.17
ENSG00000076641	PAG1	protein_coding	phosphoprotein membrane anchor with glycosphingolipid microdomains 1	1.6	8.44e-14	1.18e-11	646	202	424
ENSG00000198944	SOWAHA	protein_coding	sosondowah ankyrin repeat domain family member A	1.6	0.00035	0.00758	43.1	3.24	23.2
ENSG00000256162	SMLR1	protein_coding	small leucine rich protein 1	1.58	3.55e-10	3.16e-08	383	118	250
ENSG00000135220	UGT2A3	protein_coding	UDP glucuronosyltransferase family 2 member A3	1.58	0.000196	0.00471	133	21.1	77.1
ENSG00000173597	SULT1B1	protein_coding	sulfotransferase family 1B member 1	1.56	0.000341	0.00743	17.6	0	8.81
ENSG00000163295	ALPI	protein_coding	alkaline phosphatase, intestinal	1.54	0.00037	0.00788	24.6	2.24	13.4
ENSG00000073849	ST6GAL1	protein_coding	ST6 beta-galactoside alpha-2,6-sialyltransferase 1	1.53	4.02e-68	3.38e-64	10200	3500	6850
ENSG00000198734	F5	protein_coding	coagulation factor V	1.53	1.89e-30	1.1e-27	8300	2820	5560
ENSG00000113494	PRLR	protein_coding	prolactin receptor	1.53	1.04e-27	5.15e-25	3690	1250	2470
ENSG00000110245	APOC3	protein_coding	apolipoprotein C3	1.52	4.76e-12	5.41e-10	610	199	405
ENSG00000132437	DDC	protein_coding	dopa decarboxylase	1.51	8.62e-06	0.000313	168	46.7	107
ENSG00000182890	GLUD2	protein_coding	glutamate dehydrogenase 2	1.51	0.000135	0.00343	148	31.2	89.3
ENSG00000119927	GPAM	protein_coding	glycerol-3-phosphate acyltransferase, mitochondrial	1.5	1.16e-10	1.1e-08	645	211	428
ENSG00000009950	MLXIPL	protein_coding	MLX interacting protein like	1.5	2.53e-10	2.34e-08	643	211	427
ENSG00000172497	ACOT12	protein_coding	acyl-CoA thioesterase 12	1.5	0.000368	0.00787	117	14.5	65.9
ENSG00000171560	FGA	protein_coding	fibrinogen alpha chain	1.49	2.54e-48	4.28e-45	12900	4540	8730
ENSG00000135929	CYP27A1	protein_coding	cytochrome P450 family 27 subfamily A member 1	1.49	2e-06	8.77e-05	308	91.1	200
ENSG00000156968	MPV17L	protein_coding	MPV17 mitochondrial inner membrane protein like	1.47	1.78e-08	1.2e-06	303	98.9	201
ENSG00000173930	SLCO4C1	protein_coding	solute carrier organic anion transporter family member 4C1	1.47	2.44e-08	1.59e-06	452	147	300
ENSG00000105707	HPN	protein_coding	hepsin	1.47	6.83e-08	3.94e-06	515	166	340
ENSG00000241635	UGT1A1	protein_coding	UDP glucuronosyltransferase family 1 member A1	1.47	5.64e-05	0.00165	158	40.7	99.3
ENSG00000143653	SCCPDH	protein_coding	saccharopine dehydrogenase (putative)	1.46	2.37e-05	0.000772	229	63.8	146
ENSG00000148702	HABP2	protein_coding	hyaluronan binding protein 2	1.44	4.53e-21	1.25e-18	5290	1900	3590
ENSG00000136960	ENPP2	protein_coding	ectonucleotide pyrophosphatase/phosphodiesterase 2	1.44	2.17e-17	4.4e-15	945	337	641
ENSG00000169562	GJB1	protein_coding	gap junction protein beta 1	1.44	6.29e-09	4.68e-07	1060	357	710
ENSG00000171766	GATM	protein_coding	glycine amidinotransferase	1.42	7.09e-41	7.01e-38	3300	1220	2260
ENSG00000186417	GLDN	protein_coding	gliomedin	1.41	0.000358	0.00772	30.7	0	15.4
ENSG00000182108	DEXI	protein_coding	Dexi homolog	1.41	0.000477	0.00979	30.1	0.54	15.3
ENSG00000000971	CFH	protein_coding	complement factor H	1.4	3.49e-10	3.12e-08	3560	1260	2410
ENSG00000184441	AP001062.1	antisense	novel transcript, antisense to C21orf2	1.4	4.11e-05	0.00125	166	47.9	107
ENSG00000163581	SLC2A2	protein_coding	solute carrier family 2 member 2	1.4	4.79e-05	0.00143	145	40.6	93
ENSG00000007402	CACNA2D2	protein_coding	calcium voltage-gated channel auxiliary subunit alpha2delta 2	1.4	0.000407	0.00855	21.9	0	10.9
ENSG00000168792	ABHD15	protein_coding	abhydrolase domain containing 15	1.39	3.32e-05	0.00105	161	47.6	104
ENSG00000188582	PAQR9	protein_coding	progestin and adipoQ receptor family member 9	1.39	4.16e-05	0.00126	272	78.8	175
ENSG00000119227	PIGZ	protein_coding	phosphatidylinositol glycan anchor biosynthesis class Z	1.37	1.37e-10	1.29e-08	1150	417	781
ENSG00000057593	F7	protein_coding	coagulation factor VII	1.37	1.77e-09	1.4e-07	532	191	361
ENSG00000005844	ITGAL	protein_coding	integrin subunit alpha L	1.37	6.26e-07	3.1e-05	315	107	211
ENSG00000053328	METTL24	protein_coding	methyltransferase like 24	1.37	0.000587	0.0114	32.4	1.62	17
ENSG00000168306	ACOX2	protein_coding	acyl-CoA oxidase 2	1.35	2.43e-07	1.31e-05	468	163	316
ENSG00000168237	GLYCTK	protein_coding	glycerate kinase	1.35	1.67e-06	7.49e-05	275	93.2	184
ENSG00000161944	ASGR2	protein_coding	asialoglycoprotein receptor 2	1.34	2.33e-21	6.53e-19	3530	1360	2450
ENSG00000255468	AP001107.9	antisense	NULL	1.34	8.14e-09	5.88e-07	723	262	493
ENSG00000159423	ALDH4A1	protein_coding	aldehyde dehydrogenase 4 family member A1	1.34	4.46e-07	2.29e-05	389	137	263
ENSG00000145934	TENM2	protein_coding	teneurin transmembrane protein 2	1.33	3.52e-06	0.000142	636	217	427
ENSG00000166126	AMN	protein_coding	amnion associated transmembrane protein	1.33	4.28e-06	0.00017	230	77.7	154
ENSG00000261167	AC107027.3	sense_overlapping	novel transcript, overlapping to MRPL3	1.32	0.00056	0.011	83.8	13	48.4
ENSG00000079739	PGM1	protein_coding	phosphoglucomutase 1	1.31	2.88e-14	4.32e-12	914	355	634
ENSG00000184500	PROS1	protein_coding	protein S	1.31	4.08e-11	4.03e-09	1250	477	865
ENSG00000113492	AGXT2	protein_coding	alanine--glyoxylate aminotransferase 2	1.3	0.000235	0.00545	79.6	20.8	50.2
ENSG00000121691	CAT	protein_coding	catalase	1.29	1.24e-17	2.56e-15	1280	509	896
ENSG00000060566	CREB3L3	protein_coding	cAMP responsive element binding protein 3 like 3	1.28	5.62e-13	7.32e-11	1050	412	731
ENSG00000158874	APOA2	protein_coding	apolipoprotein A2	1.27	2.41e-39	1.84e-36	55900	22900	39400
ENSG00000135744	AGT	protein_coding	angiotensinogen	1.27	6.64e-23	1.99e-20	13500	5480	9500
ENSG00000095539	SEMA4G	protein_coding	semaphorin 4G	1.27	8.03e-12	8.89e-10	2350	923	1640
ENSG00000106258	CYP3A5	protein_coding	cytochrome P450 family 3 subfamily A member 5	1.26	1.87e-06	8.29e-05	372	135	254
ENSG00000005421	PON1	protein_coding	paraoxonase 1	1.26	2.91e-06	0.00012	513	185	349
ENSG00000186910	SERPINA11	protein_coding	serpin family A member 11	1.26	0.000509	0.0103	123	25.9	74.3
ENSG00000266709	AC005224.4	lincRNA	NULL	1.26	0.00063	0.0121	9.11	0	4.55
ENSG00000178772	CPN2	protein_coding	carboxypeptidase N subunit 2	1.25	1.55e-12	1.91e-10	1160	463	810
ENSG00000026950	BTN3A1	protein_coding	butyrophilin subfamily 3 member A1	1.25	0.000194	0.00464	164	47.2	106
ENSG00000181856	SLC2A4	protein_coding	solute carrier family 2 member 4	1.25	0.000639	0.0122	62.8	11.9	37.4
ENSG00000197249	SERPINA1	protein_coding	serpin family A member 1	1.24	2.25e-20	5.73e-18	53400	22100	37700
ENSG00000117601	SERPINC1	protein_coding	serpin family C member 1	1.24	2.72e-06	0.000114	177	63.8	120
ENSG00000171759	PAH	protein_coding	phenylalanine hydroxylase	1.23	1.4e-17	2.87e-15	8710	3610	6160
ENSG00000104760	FGL1	protein_coding	fibrinogen like 1	1.23	2.53e-06	0.000107	745	275	510
ENSG00000130988	RGN	protein_coding	regucalcin	1.23	3.53e-05	0.00111	131	44.5	87.6
ENSG00000135447	PPP1R1A	protein_coding	protein phosphatase 1 regulatory inhibitor subunit 1A	1.23	0.000232	0.0054	506	144	325
ENSG00000151655	ITIH2	protein_coding	inter-alpha-trypsin inhibitor heavy chain 2	1.22	7.85e-51	1.89e-47	26200	11100	18600
ENSG00000163631	ALB	protein_coding	albumin	1.22	2.65e-47	4.05e-44	144000	61200	102000
ENSG00000152256	PDK1	protein_coding	pyruvate dehydrogenase kinase 1	1.22	2.08e-12	2.51e-10	733	301	517
ENSG00000105697	HAMP	protein_coding	hepcidin antimicrobial peptide	1.22	1.93e-09	1.52e-07	1060	425	745
ENSG00000084734	GCKR	protein_coding	glucokinase regulator	1.22	4.63e-05	0.00138	124	42.1	83.2
ENSG00000204128	C2orf72	protein_coding	chromosome 2 open reading frame 72	1.21	1.86e-10	1.74e-08	817	335	576
ENSG00000111319	SCNN1A	protein_coding	sodium channel epithelial 1 alpha subunit	1.21	5.28e-10	4.53e-08	1250	506	876
ENSG00000071073	MGAT4A	protein_coding	alpha-1,3-mannosyl-glycoprotein 4-beta-N-acetylglucosaminyltransferase A	1.21	1.55e-08	1.06e-06	666	267	466
ENSG00000130005	GAMT	protein_coding	guanidinoacetate N-methyltransferase	1.21	1.32e-07	7.3e-06	883	348	615
ENSG00000142484	TM4SF5	protein_coding	transmembrane 4 L six family member 5	1.21	5.97e-05	0.00174	189	64.8	127
ENSG00000146678	IGFBP1	protein_coding	insulin like growth factor binding protein 1	1.21	0.000576	0.0113	18.8	0	9.38
ENSG00000132549	VPS13B	protein_coding	vacuolar protein sorting 13 homolog B	1.19	1.23e-09	1.01e-07	2230	913	1570
ENSG00000106804	C5	protein_coding	complement C5	1.18	2.33e-16	4.31e-14	7260	3110	5180
ENSG00000174080	CTSF	protein_coding	cathepsin F	1.18	7.18e-09	5.25e-07	1020	417	716
ENSG00000197872	FAM49A	protein_coding	family with sequence similarity 49 member A	1.18	6.21e-06	0.000234	373	142	258
ENSG00000112394	SLC16A10	protein_coding	solute carrier family 16 member 10	1.18	6.71e-05	0.00192	226	78	152
ENSG00000116704	SLC35D1	protein_coding	solute carrier family 35 member D1	1.17	2.01e-15	3.45e-13	1340	577	960
ENSG00000151632	AKR1C2	protein_coding	aldo-keto reductase family 1 member C2	1.17	2.64e-14	4e-12	3560	1520	2540
ENSG00000157873	TNFRSF14	protein_coding	TNF receptor superfamily member 14	1.17	0.000977	0.0174	25.5	3.24	14.4
ENSG00000148672	GLUD1	protein_coding	glutamate dehydrogenase 1	1.16	2.88e-13	3.88e-11	1940	834	1390
ENSG00000156096	UGT2B4	protein_coding	UDP glucuronosyltransferase family 2 member B4	1.16	1.06e-08	7.47e-07	2110	875	1490
ENSG00000176387	HSD11B2	protein_coding	hydroxysteroid 11-beta dehydrogenase 2	1.16	3.43e-07	1.8e-05	732	295	513
ENSG00000146070	PLA2G7	protein_coding	phospholipase A2 group VII	1.16	3.28e-05	0.00104	336	123	229
ENSG00000118137	APOA1	protein_coding	apolipoprotein A1	1.15	1.41e-13	1.94e-11	1510	654	1080
ENSG00000270084	GAS5-AS1	antisense	GAS5 antisense RNA 1	1.15	0.00071	0.0133	32.9	0.388	16.6
ENSG00000138207	RBP4	protein_coding	retinol binding protein 4	1.14	4.08e-33	2.64e-30	28300	12700	20500
ENSG00000104419	NDRG1	protein_coding	N-myc downstream regulated 1	1.14	7.72e-20	1.88e-17	1960	870	1420
ENSG00000189221	MAOA	protein_coding	monoamine oxidase A	1.14	1.68e-05	0.000571	552	211	381
ENSG00000120915	EPHX2	protein_coding	epoxide hydrolase 2	1.13	0.000186	0.00452	337	113	225
ENSG00000130487	KLHDC7B	protein_coding	kelch domain containing 7B	1.13	0.000202	0.0048	172	56.8	114
ENSG00000165215	CLDN3	protein_coding	claudin 3	1.13	0.00112	0.0194	39.8	5.03	22.4
ENSG00000187134	AKR1C1	protein_coding	aldo-keto reductase family 1 member C1	1.11	3.24e-11	3.28e-09	1640	724	1180
ENSG00000182179	UBA7	protein_coding	ubiquitin like modifier activating enzyme 7	1.11	7.59e-05	0.00215	120	43.9	81.9
ENSG00000165475	CRYL1	protein_coding	crystallin lambda 1	1.11	0.00026	0.00589	324	107	215
ENSG00000119431	HDHD3	protein_coding	haloacid dehalogenase like hydrolase domain containing 3	1.1	6.9e-05	0.00197	191	71.7	131
ENSG00000114638	UPK1B	protein_coding	uroplakin 1B	1.09	6.52e-06	0.000243	332	135	234
ENSG00000111885	MAN1A1	protein_coding	mannosidase alpha class 1A member 1	1.09	2.87e-05	0.000922	9190	3590	6390
ENSG00000163501	IHH	protein_coding	indian hedgehog	1.09	8.57e-05	0.00239	121	44	82.3
ENSG00000176046	NUPR1	protein_coding	nuclear protein 1, transcriptional regulator	1.09	0.000787	0.0146	187	49.2	118
ENSG00000189319	FAM53B	protein_coding	family with sequence similarity 53 member B	1.08	0.000587	0.0114	195	56.8	126
ENSG00000095585	BLNK	protein_coding	B cell linker	1.08	0.000908	0.0164	8.25	0	4.13
ENSG00000154269	ENPP3	protein_coding	ectonucleotide pyrophosphatase/phosphodiesterase 3	1.08	0.00129	0.0217	27.1	4.32	15.7
ENSG00000008513	ST3GAL1	protein_coding	ST3 beta-galactoside alpha-2,3-sialyltransferase 1	1.07	6.84e-08	3.94e-06	541	239	390
ENSG00000169174	PCSK9	protein_coding	proprotein convertase subtilisin/kexin type 9	1.07	7.66e-08	4.36e-06	1070	470	768
ENSG00000141959	PFKL	protein_coding	phosphofructokinase, liver type	1.07	3.1e-07	1.65e-05	430	187	309
ENSG00000235142	LINC02532	lincRNA	long intergenic non-protein coding RNA 2532	1.07	2.13e-05	0.000701	331	133	232
ENSG00000169738	DCXR	protein_coding	dicarbonyl and L-xylulose reductase	1.06	2.21e-08	1.45e-06	1180	525	853
ENSG00000104870	FCGRT	protein_coding	Fc fragment of IgG receptor and transporter	1.06	7.15e-07	3.51e-05	905	394	649
ENSG00000099337	KCNK6	protein_coding	potassium two pore domain channel subfamily K member 6	1.06	0.000827	0.0151	13.1	0	6.57
ENSG00000177133	LINC00982	antisense	long intergenic non-protein coding RNA 982	1.06	0.000859	0.0156	11.8	0	5.91
ENSG00000164976	MYORG	protein_coding	myogenesis regulating glycosidase (putative)	1.05	6.94e-13	8.91e-11	971	452	712
ENSG00000136371	MTHFS	protein_coding	methenyltetrahydrofolate synthetase	1.05	0.000745	0.0139	19.7	0	9.86
ENSG00000104044	OCA2	protein_coding	OCA2 melanosomal transmembrane protein	1.05	0.00121	0.0207	244	54.5	149
ENSG00000114023	FAM162A	protein_coding	family with sequence similarity 162 member A	1.04	4.32e-08	2.63e-06	660	297	478
ENSG00000157214	STEAP2	protein_coding	STEAP2 metalloreductase	1.04	9.01e-06	0.000326	383	161	272
ENSG00000182326	C1S	protein_coding	complement C1s	1.04	0.00051	0.0103	183	59.6	121
ENSG00000171557	FGG	protein_coding	fibrinogen gamma chain	1.03	4.04e-06	0.000162	12200	5280	8720
ENSG00000044459	CNTLN	protein_coding	centlein	1.03	4.71e-06	0.000184	556	240	398
ENSG00000214274	ANG	protein_coding	angiogenin	1.03	1.13e-05	0.000404	282	118	200
ENSG00000140284	SLC27A2	protein_coding	solute carrier family 27 member 2	1.03	0.00066	0.0126	77	23.4	50.2
ENSG00000256185	AC055720.2	3prime_overlapping_ncRNA	novel transcript	1.03	0.000828	0.0151	16.2	0	8.11
ENSG00000278962	AC092645.1	TEC	TEC	1.03	0.000892	0.0162	13.2	0	6.6
ENSG00000204709	LINC01556	lincRNA	long intergenic non-protein coding RNA 1556	1.02	0.000769	0.0143	21.2	0	10.6
ENSG00000123609	NMI	protein_coding	N-myc and STAT interactor	1.02	0.000817	0.015	18.2	0	9.1
ENSG00000065361	ERBB3	protein_coding	erb-b2 receptor tyrosine kinase 3	1.01	1e-20	2.63e-18	7100	3460	5280
ENSG00000182378	PLCXD1	protein_coding	phosphatidylinositol specific phospholipase C X domain containing 1	1.01	5.66e-13	7.32e-11	3230	1550	2390
ENSG00000106351	AGFG2	protein_coding	ArfGAP with FG repeats 2	1.01	3.11e-10	2.84e-08	1190	559	876
ENSG00000170271	FAXDC2	protein_coding	fatty acid hydroxylase domain containing 2	1.01	3.7e-10	3.28e-08	1460	690	1080
ENSG00000132274	TRIM22	protein_coding	tripartite motif containing 22	1	0.000983	0.0175	11	0	5.5
ENSG00000164574	GALNT10	protein_coding	polypeptide N-acetylgalactosaminyltransferase 10	-1	2.57e-15	4.33e-13	2570	5320	3950
ENSG00000162734	PEA15	protein_coding	proliferation and apoptosis adaptor protein 15	-1.01	2.38e-11	2.47e-09	2930	6170	4550
ENSG00000127863	TNFRSF19	protein_coding	TNF receptor superfamily member 19	-1.01	1.1e-09	9.04e-08	1260	2680	1970
ENSG00000075426	FOSL2	protein_coding	FOS like 2, AP-1 transcription factor subunit	-1.01	7.96e-09	5.77e-07	447	960	704
ENSG00000137193	PIM1	protein_coding	Pim-1 proto-oncogene, serine/threonine kinase	-1.01	4.46e-06	0.000177	255	582	418
ENSG00000196352	CD55	protein_coding	CD55 molecule (Cromer blood group)	-1.02	4e-07	2.07e-05	460	1020	739
ENSG00000146072	TNFRSF21	protein_coding	TNF receptor superfamily member 21	-1.03	5.12e-23	1.59e-20	4370	9100	6730
ENSG00000173334	TRIB1	protein_coding	tribbles pseudokinase 1	-1.04	5.48e-18	1.18e-15	1870	3950	2910
ENSG00000163251	FZD5	protein_coding	frizzled class receptor 5	-1.04	3.33e-13	4.44e-11	1790	3810	2800
ENSG00000020577	SAMD4A	protein_coding	sterile alpha motif domain containing 4A	-1.04	2.35e-06	0.0001	660	1520	1090
ENSG00000230033	AC006357.1	lincRNA	novel transcript	-1.05	0.000612	0.0119	0	35	17.5
ENSG00000139793	MBNL2	protein_coding	muscleblind like splicing regulator 2	-1.06	5.59e-18	1.19e-15	4220	9030	6630
ENSG00000048052	HDAC9	protein_coding	histone deacetylase 9	-1.06	2.53e-07	1.36e-05	1190	2720	1960
ENSG00000099860	GADD45B	protein_coding	growth arrest and DNA damage inducible beta	-1.06	0.00013	0.00333	231	622	427
ENSG00000140682	TGFB1I1	protein_coding	transforming growth factor beta 1 induced transcript 1	-1.06	0.000451	0.00935	129	397	263
ENSG00000074527	NTN4	protein_coding	netrin 4	-1.06	0.000566	0.0111	82.5	269	176
ENSG00000158710	TAGLN2	protein_coding	transgelin 2	-1.07	7.08e-21	1.89e-18	6550	14000	10300
ENSG00000189212	DPY19L2P1	transcribed_unprocessed_pseudogene	DPY19L2 pseudogene 1	-1.09	0.000622	0.012	0	26.3	13.1
ENSG00000143878	RHOB	protein_coding	ras homolog family member B	-1.1	7.77e-14	1.1e-11	1760	3930	2850
ENSG00000136997	MYC	protein_coding	MYC proto-oncogene, bHLH transcription factor	-1.11	7.62e-26	3.29e-23	3790	8350	6070
ENSG00000114019	AMOTL2	protein_coding	angiomotin like 2	-1.11	2.36e-17	4.72e-15	4370	9720	7050
ENSG00000138119	MYOF	protein_coding	myoferlin	-1.12	1.49e-05	0.000518	760	1940	1350
ENSG00000203808	BVES-AS1	antisense	BVES antisense RNA 1	-1.12	0.000794	0.0147	0	9.83	4.91
ENSG00000090530	P3H2	protein_coding	prolyl 3-hydroxylase 2	-1.13	1.54e-05	0.00053	406	1050	727
ENSG00000248690	HAS2-AS1	processed_transcript	HAS2 antisense RNA 1	-1.13	0.000653	0.0125	0	18	9.01
ENSG00000139926	FRMD6	protein_coding	FERM domain containing 6	-1.14	0.000163	0.00403	130	387	258
ENSG00000125148	MT2A	protein_coding	metallothionein 2A	-1.15	1.55e-09	1.25e-07	336	796	566
ENSG00000153707	PTPRD	protein_coding	protein tyrosine phosphatase, receptor type D	-1.15	0.000908	0.0164	11.8	59.9	35.9
ENSG00000120129	DUSP1	protein_coding	dual specificity phosphatase 1	-1.16	3.04e-14	4.53e-12	1700	3960	2830
ENSG00000159176	CSRP1	protein_coding	cysteine and glycine rich protein 1	-1.17	6.19e-10	5.25e-08	1740	4150	2950
ENSG00000187123	LYPD6	protein_coding	LY6/PLAUR domain containing 6	-1.17	1.48e-08	1.02e-06	346	839	593
ENSG00000074370	ATP2A3	protein_coding	ATPase sarcoplasmic/endoplasmic reticulum Ca2+ transporting 3	-1.19	0.000463	0.00954	25.3	96.3	60.8
ENSG00000198455	ZXDB	protein_coding	zinc finger X-linked duplicated B	-1.21	1.28e-06	5.89e-05	332	872	602
ENSG00000026025	VIM	protein_coding	vimentin	-1.23	2.4e-18	5.31e-16	4200	10100	7150
ENSG00000198720	ANKRD13B	protein_coding	ankyrin repeat domain 13B	-1.24	0.000168	0.00415	48.2	163	105
ENSG00000078401	EDN1	protein_coding	endothelin 1	-1.25	0.000421	0.00883	135	563	349
ENSG00000122641	INHBA	protein_coding	inhibin subunit beta A	-1.25	0.000789	0.0146	10.9	144	77.5
ENSG00000168386	FILIP1L	protein_coding	filamin A interacting protein 1 like	-1.26	3.95e-26	1.78e-23	3230	7870	5550
ENSG00000163545	NUAK2	protein_coding	NUAK family kinase 2	-1.27	1.26e-07	7.05e-06	489	1310	898
ENSG00000151693	ASAP2	protein_coding	ArfGAP with SH3 domain, ankyrin repeat and PH domain 2	-1.28	4.61e-10	4.04e-08	422	1090	758
ENSG00000105974	CAV1	protein_coding	caveolin 1	-1.29	3.33e-11	3.36e-09	717	1850	1290
ENSG00000118523	CTGF	protein_coding	connective tissue growth factor	-1.3	4.03e-26	1.78e-23	4740	11900	8310
ENSG00000111799	COL12A1	protein_coding	collagen type XII alpha 1 chain	-1.3	1.86e-06	8.28e-05	516	1460	989
ENSG00000275342	PRAG1	protein_coding	PEAK1 related, kinase-activating pseudokinase 1	-1.31	1.79e-12	2.19e-10	839	2190	1510
ENSG00000070404	FSTL3	protein_coding	follistatin like 3	-1.32	1.33e-05	0.000467	247	754	500
ENSG00000169432	SCN9A	protein_coding	sodium voltage-gated channel alpha subunit 9	-1.33	3.32e-15	5.46e-13	1100	2860	1980
ENSG00000149231	CCDC82	protein_coding	coiled-coil domain containing 82	-1.33	3.64e-05	0.00113	88.3	284	186
ENSG00000127124	HIVEP3	protein_coding	human immunodeficiency virus type I enhancer binding protein 3	-1.34	0.00043	0.00897	28.7	151	89.7
ENSG00000091986	CCDC80	protein_coding	coiled-coil domain containing 80	-1.35	1.81e-06	8.09e-05	464	1370	915
ENSG00000116717	GADD45A	protein_coding	growth arrest and DNA damage inducible alpha	-1.38	1.28e-08	8.9e-07	357	1020	686
ENSG00000119866	BCL11A	protein_coding	B cell CLL/lymphoma 11A	-1.39	1.74e-05	0.000585	78.6	258	168
ENSG00000135046	ANXA1	protein_coding	annexin A1	-1.39	3.94e-05	0.00121	323	1110	718
ENSG00000150938	CRIM1	protein_coding	cysteine rich transmembrane BMP regulator 1	-1.4	2.01e-23	6.64e-21	3980	10700	7360
ENSG00000184697	CLDN6	protein_coding	claudin 6	-1.42	7.48e-16	1.34e-13	1640	4550	3090
ENSG00000163430	FSTL1	protein_coding	follistatin like 1	-1.44	8.27e-22	2.36e-19	4460	12400	8440
ENSG00000077157	PPP1R12B	protein_coding	protein phosphatase 1 regulatory subunit 12B	-1.44	3.42e-10	3.08e-08	541	1570	1060
ENSG00000175592	FOSL1	protein_coding	FOS like 1, AP-1 transcription factor subunit	-1.47	4.7e-06	0.000184	145	484	315
ENSG00000166147	FBN1	protein_coding	fibrillin 1	-1.48	2.53e-17	5e-15	852	2470	1660
ENSG00000125378	BMP4	protein_coding	bone morphogenetic protein 4	-1.48	3.67e-16	6.7e-14	446	1290	868
ENSG00000162746	FCRLB	protein_coding	Fc receptor like B	-1.48	0.000326	0.00718	10	65.9	38
ENSG00000130176	CNN1	protein_coding	calponin 1	-1.49	0.000336	0.00735	20.1	144	82
ENSG00000113657	DPYSL3	protein_coding	dihydropyrimidinase like 3	-1.51	3.67e-12	4.28e-10	413	1250	830
ENSG00000180096	SEPT1	protein_coding	septin 1	-1.51	0.000414	0.0087	3.08	37.1	20.1
ENSG00000214049	UCA1	lincRNA	urothelial cancer associated 1	-1.53	5.94e-12	6.71e-10	224	687	456
ENSG00000108551	RASD1	protein_coding	ras related dexamethasone induced 1	-1.53	3.88e-11	3.86e-09	283	878	580
ENSG00000206538	VGLL3	protein_coding	vestigial like family member 3	-1.56	0.000125	0.00324	686	3420	2050
ENSG00000075461	CACNG4	protein_coding	calcium voltage-gated channel auxiliary subunit gamma 4	-1.57	8.74e-05	0.00242	85.7	403	244
ENSG00000111859	NEDD9	protein_coding	neural precursor cell expressed, developmentally down-regulated 9	-1.59	1.29e-19	3.05e-17	967	3010	1990
ENSG00000101670	LIPG	protein_coding	lipase G, endothelial type	-1.59	1.72e-07	9.4e-06	65.2	226	146
ENSG00000117525	F3	protein_coding	coagulation factor III, tissue factor	-1.59	6.78e-06	0.000252	71.2	271	171
ENSG00000118257	NRP2	protein_coding	neuropilin 2	-1.62	2.34e-15	3.97e-13	990	3200	2090
ENSG00000134013	LOXL2	protein_coding	lysyl oxidase like 2	-1.62	6.18e-06	0.000233	158	617	387
ENSG00000182752	PAPPA	protein_coding	pappalysin 1	-1.62	0.000142	0.00358	27.4	159	93.2
ENSG00000172748	ZNF596	protein_coding	zinc finger protein 596	-1.62	0.000367	0.00785	0.885	30.2	15.6
ENSG00000168631	MUCL3	protein_coding	mucin like 3	-1.69	0.000234	0.00542	0	35.8	17.9
ENSG00000152661	GJA1	protein_coding	gap junction protein alpha 1	-1.7	1.15e-43	1.29e-40	3790	12500	8140
ENSG00000167552	TUBA1A	protein_coding	tubulin alpha 1a	-1.72	1.81e-23	6.08e-21	2340	7980	5160
ENSG00000150782	IL18	protein_coding	interleukin 18	-1.73	6.61e-08	3.83e-06	251	961	606
ENSG00000145632	PLK2	protein_coding	polo like kinase 2	-1.75	1.99e-22	5.87e-20	711	2480	1600
ENSG00000205362	MT1A	protein_coding	metallothionein 1A	-1.78	6.86e-07	3.38e-05	44.3	185	115
ENSG00000058335	RASGRF1	protein_coding	Ras protein specific guanine nucleotide releasing factor 1	-1.79	0.000251	0.0057	7.95	150	79.2
ENSG00000154127	UBASH3B	protein_coding	ubiquitin associated and SH3 domain containing B	-1.84	4.23e-13	5.6e-11	441	1710	1080
ENSG00000150687	PRSS23	protein_coding	serine protease 23	-1.86	2.73e-23	8.67e-21	804	3040	1920
ENSG00000248329	APELA	protein_coding	apelin receptor early endogenous ligand	-1.86	0.000129	0.00332	30.8	296	163
ENSG00000089199	CHGB	protein_coding	chromogranin B	-1.87	0.000202	0.0048	2.21	36.1	19.1
ENSG00000140416	TPM1	protein_coding	tropomyosin 1	-1.91	3.36e-17	6.43e-15	244	978	611
ENSG00000132561	MATN2	protein_coding	matrilin 2	-1.91	4.84e-06	0.000188	68.6	358	213
ENSG00000147883	CDKN2B	protein_coding	cyclin dependent kinase inhibitor 2B	-1.95	7.59e-14	1.08e-11	424	1780	1100
ENSG00000074590	NUAK1	protein_coding	NUAK family kinase 1	-1.96	1.02e-18	2.28e-16	739	3040	1890
ENSG00000136859	ANGPTL2	protein_coding	angiopoietin like 2	-1.97	3.5e-11	3.5e-09	126	550	338
ENSG00000113070	HBEGF	protein_coding	heparin binding EGF like growth factor	-1.98	2.12e-11	2.23e-09	227	1000	615
ENSG00000143199	ADCY10	protein_coding	adenylate cyclase 10	-1.99	0.000191	0.0046	1.3	35	18.2
ENSG00000142871	CYR61	protein_coding	cysteine rich angiogenic inducer 61	-2.11	1.65e-29	8.97e-27	1740	7790	4760
ENSG00000133816	MICAL2	protein_coding	microtubule associated monooxygenase, calponin and LIM domain containing 2	-2.12	1.08e-48	2.01e-45	1590	7070	4330
ENSG00000163171	CDC42EP3	protein_coding	CDC42 effector protein 3	-2.13	7.17e-06	0.000264	77.9	540	309
ENSG00000137801	THBS1	protein_coding	thrombospondin 1	-2.17	2.18e-46	3.06e-43	4180	19300	11700
ENSG00000013588	GPRC5A	protein_coding	G protein-coupled receptor class C group 5 member A	-2.28	1.66e-08	1.13e-06	125	771	448
ENSG00000198417	MT1F	protein_coding	metallothionein 1F	-2.29	1.28e-19	3.05e-17	45	240	142
ENSG00000170989	S1PR1	protein_coding	sphingosine-1-phosphate receptor 1	-2.34	8.06e-05	0.00225	1.3	25.5	13.4
ENSG00000135636	DYSF	protein_coding	dysferlin	-2.39	1.19e-05	0.000422	3.89	39.2	21.6
ENSG00000148677	ANKRD1	protein_coding	ankyrin repeat domain 1	-2.4	6.31e-24	2.31e-21	925	5220	3070
ENSG00000092969	TGFB2	protein_coding	transforming growth factor beta 2	-2.43	1.15e-39	9.67e-37	1100	6180	3640
ENSG00000139292	LGR5	protein_coding	leucine rich repeat containing G protein-coupled receptor 5	-2.62	4.76e-50	1e-46	335	2140	1240
ENSG00000121966	CXCR4	protein_coding	C-X-C motif chemokine receptor 4	-3.27	1.37e-09	1.11e-07	41.2	543	292
ENSG00000120937	NPPB	protein_coding	natriuretic peptide B	-3.51	9.9e-19	2.25e-16	58.1	753	405
ENSG00000178150	ZNF114	protein_coding	zinc finger protein 114	-4.45	1.43e-05	0.000498	0	48.5	24.2

## Sheet: IL10R2KO_IFNL4 vs Mock
Ensembl_Gene_ID	Symbol	Definition	Biotype	logFC	p-value	adj, P-value	IL10R2KO_IFNL4_normalized_counts	IL10R2KO_Mock_normalized_counts	Mean
ENSG00000272395	IFNL4	polymorphic_pseudogene	interferon lambda 4 (gene/pseudogene)	11.4	1.74e-80	4.13e-76	9740	3.4	4870
ENSG00000257017	HP	protein_coding	haptoglobin	3.27	6.86e-18	1.25e-14	229	18.7	124
ENSG00000128342	LIF	protein_coding	LIF, interleukin 6 family cytokine	2.66	1.12e-10	5.03e-08	444	50.1	247
ENSG00000000971	CFH	protein_coding	complement factor H	2.62	2.74e-28	1.08e-24	1480	221	849
ENSG00000145934	TENM2	protein_coding	teneurin transmembrane protein 2	2.24	6.25e-11	2.9e-08	173	29.3	101
ENSG00000047457	CP	protein_coding	ceruloplasmin	2.17	2.76e-35	2.18e-31	2990	637	1810
ENSG00000128591	FLNC	protein_coding	filamin C	2.12	2.05e-17	3.24e-14	216	45	130
ENSG00000203930	LINC00632	antisense	long intergenic non-protein coding RNA 632	2.01	1.15e-17	1.94e-14	1650	376	1010
ENSG00000186910	SERPINA11	protein_coding	serpin family A member 11	1.96	3.04e-06	0.000423	166	19.5	92.6
ENSG00000173210	ABLIM3	protein_coding	actin binding LIM protein family member 3	1.95	1.56e-35	1.85e-31	1240	309	775
ENSG00000257743	MGAM2	protein_coding	maltase-glucoamylase 2 (putative)	1.93	9.31e-14	7.12e-11	2020	471	1240
ENSG00000093134	VNN3	protein_coding	vanin 3	1.83	6.72e-09	2.07e-06	549	123	336
ENSG00000006659	LGALS14	protein_coding	galectin 14	1.77	2.05e-08	5.29e-06	527	121	324
ENSG00000090534	THPO	protein_coding	thrombopoietin	1.74	1.05e-08	2.99e-06	159	37.5	98.3
ENSG00000132854	KANK4	protein_coding	KN motif and ankyrin repeat domains 4	1.61	5.67e-06	0.000722	94.9	17.8	56.3
ENSG00000108924	HLF	protein_coding	HLF, PAR bZIP transcription factor	1.6	2.57e-09	8.36e-07	222	61	142
ENSG00000221963	APOL6	protein_coding	apolipoprotein L6	1.57	3.85e-15	3.65e-12	772	239	505
ENSG00000129353	SLC44A2	protein_coding	solute carrier family 44 member 2	1.56	6.87e-10	2.58e-07	205	59.1	132
ENSG00000165471	MBL2	protein_coding	mannose binding lectin 2	1.55	8.44e-16	1e-12	3530	1110	2320
ENSG00000166450	PRTG	protein_coding	protogenin	1.55	8.6e-12	4.74e-09	285	86.8	186
ENSG00000189056	RELN	protein_coding	reelin	1.53	1.46e-09	5.32e-07	208	61.5	135
ENSG00000084110	HAL	protein_coding	histidine ammonia-lyase	1.51	1.46e-12	8.67e-10	560	176	368
ENSG00000087266	SH3BP2	protein_coding	SH3 domain binding protein 2	1.48	1.27e-10	5.55e-08	503	157	330
ENSG00000145623	OSMR	protein_coding	oncostatin M receptor	1.45	1.31e-21	3.1e-18	2960	1030	2000
ENSG00000131711	MAP1B	protein_coding	microtubule associated protein 1B	1.44	6.1e-23	1.61e-19	5050	1770	3410
ENSG00000090339	ICAM1	protein_coding	intercellular adhesion molecule 1	1.44	2.75e-20	5.93e-17	1750	607	1180
ENSG00000169174	PCSK9	protein_coding	proprotein convertase subtilisin/kexin type 9	1.37	1.41e-10	6.06e-08	363	124	244
ENSG00000135842	FAM129A	protein_coding	family with sequence similarity 129 member A	1.37	2.13e-08	5.42e-06	377	122	250
ENSG00000181722	ZBTB20	protein_coding	zinc finger and BTB domain containing 20	1.36	4.38e-10	1.67e-07	693	236	465
ENSG00000233822	HIST1H2BN	protein_coding	histone cluster 1 H2B family member n	1.36	1.52e-05	0.00168	239	53.8	147
ENSG00000100599	RIN3	protein_coding	Ras and Rab interactor 3	1.35	1.97e-08	5.14e-06	163	53.8	109
ENSG00000105137	SYDE1	protein_coding	synapse defective Rho GTPase homolog 1	1.32	3.53e-06	0.000486	84.2	24.1	54.2
ENSG00000143382	ADAMTSL4	protein_coding	ADAMTS like 4	1.28	9.73e-09	2.85e-06	823	292	558
ENSG00000146592	CREB5	protein_coding	cAMP responsive element binding protein 5	1.27	5.96e-16	7.44e-13	769	301	535
ENSG00000125730	C3	protein_coding	complement C3	1.25	1.13e-32	6.72e-29	3230	1320	2270
ENSG00000198848	CES1	protein_coding	carboxylesterase 1	1.25	2.65e-06	0.000374	1320	418	868
ENSG00000106366	SERPINE1	protein_coding	serpin family E member 1	1.23	7.44e-27	2.2e-23	5700	2350	4020
ENSG00000280347	AC000123.3	TEC	TEC	1.22	7.29e-06	0.0009	259	80.3	170
ENSG00000131187	F12	protein_coding	coagulation factor XII	1.19	1.82e-11	9.16e-09	1040	418	730
ENSG00000148516	ZEB1	protein_coding	zinc finger E-box binding homeobox 1	1.19	1.38e-07	2.87e-05	223	82.6	153
ENSG00000147255	IGSF1	protein_coding	immunoglobulin superfamily member 1	1.18	2.01e-12	1.16e-09	854	350	602
ENSG00000160181	TFF2	protein_coding	trefoil factor 2	1.18	1.48e-08	4.04e-06	5160	1990	3580
ENSG00000265972	TXNIP	protein_coding	thioredoxin interacting protein	1.17	3.81e-13	2.74e-10	878	364	621
ENSG00000142089	IFITM3	protein_coding	interferon induced transmembrane protein 3	1.16	1.59e-07	3.2e-05	13800	5260	9540
ENSG00000197714	ZNF460	protein_coding	zinc finger protein 460	1.13	1.58e-07	3.2e-05	551	215	383
ENSG00000118520	ARG1	protein_coding	arginase 1	1.12	2.96e-05	0.00301	277	82.4	180
ENSG00000123643	SLC36A1	protein_coding	solute carrier family 36 member 1	1.07	5.54e-17	8.21e-14	8500	3870	6190
ENSG00000167244	IGF2	protein_coding	insulin like growth factor 2	1.06	4.93e-08	1.12e-05	3910	1660	2780
ENSG00000169894	MUC3A	protein_coding	mucin 3A, cell surface associated	1.06	9.94e-08	2.1e-05	4540	1920	3230
ENSG00000251562	MALAT1	lincRNA	metastasis associated lung adenocarcinoma transcript 1	1.06	3.32e-07	5.82e-05	1220	509	865
ENSG00000172482	AGXT	protein_coding	alanine--glyoxylate and serine--pyruvate aminotransferase	1.05	8.65e-05	0.00712	57.9	6.69	32.3
ENSG00000229314	ORM1	protein_coding	orosomucoid 1	1.04	1.37e-12	8.34e-10	2100	963	1530
ENSG00000111452	ADGRD1	protein_coding	adhesion G protein-coupled receptor D1	1.03	5.99e-11	2.84e-08	1310	595	950
ENSG00000144152	FBLN7	protein_coding	fibulin 7	1.03	0.00011	0.00853	74.5	13.2	43.8
ENSG00000084674	APOB	protein_coding	apolipoprotein B	1.02	6.71e-17	9.35e-14	85400	40600	63000
ENSG00000127481	UBR4	protein_coding	ubiquitin protein ligase E3 component n-recognin 4	1.02	2.54e-15	2.51e-12	5910	2790	4350
ENSG00000151224	MAT1A	protein_coding	methionine adenosyltransferase 1A	1.02	0.000107	0.00835	427	102	265
ENSG00000114933	INO80D	protein_coding	INO80 complex subunit D	1.01	2.15e-09	7.38e-07	1560	712	1140
ENSG00000116127	ALMS1	protein_coding	ALMS1, centrosome and basal body associated protein	1.01	2.2e-08	5.47e-06	1470	666	1070
ENSG00000185008	ROBO2	protein_coding	roundabout guidance receptor 2	1.01	2.37e-06	0.00034	270	112	191
ENSG00000134107	BHLHE40	protein_coding	basic helix-loop-helix family member e40	1	3.88e-12	2.19e-09	5100	2410	3750
ENSG00000132561	MATN2	protein_coding	matrilin 2	-1.03	0.000113	0.00871	9.88	51.1	30.5
ENSG00000169715	MT1E	protein_coding	metallothionein 1E	-1.05	9.82e-07	0.000151	96	234	165
ENSG00000171766	GATM	protein_coding	glycine amidinotransferase	-1.08	2.71e-27	9.19e-24	7340	16000	11700
ENSG00000187193	MT1X	protein_coding	metallothionein 1X	-1.08	6.34e-06	0.000787	92.2	248	170
ENSG00000198938	MT-CO3	protein_coding	mitochondrially encoded cytochrome c oxidase III	-1.18	5.1e-18	1.01e-14	237000	565000	401000
ENSG00000107984	DKK1	protein_coding	dickkopf WNT signaling pathway inhibitor 1	-1.28	5.8e-16	7.44e-13	1760	4570	3170
ENSG00000198744	MTCO3P12	unprocessed_pseudogene	MT-CO3 pseudogene 12	-1.3	9.27e-11	4.23e-08	869	2400	1640
ENSG00000214049	UCA1	lincRNA	urothelial cancer associated 1	-1.36	1.42e-08	3.92e-06	47.4	140	93.8
ENSG00000266903	AC243964.2	antisense	novel transcript, antisense to CEACAM16, CEACAM19, PVR & IGSF23	-1.87	9.07e-12	4.89e-09	130	552	341
ENSG00000133636	NTS	protein_coding	neurotensin	-2.42	1.09e-14	9.24e-12	131	830	481
